# Supplementary material for: Anthropogenic threats to owls: Insights from rehabilitation admittance data and rodenticide screening in Texas
Source: PubMed Central journal article supplement (PMC10403058; doi:10.1371/journal.pone.0289228), 2023-08-04
Supplement: pone.0289228.s001.pdf [file pone.0289228.s001.pdf]

**S1 Table. Population estimates for owl species in Texas, US derived from the Partners in Flight Database**

| Species Common Name | Population Estimate |
|---------------------|---------------------|
| Barn Owl            | 43,000              |
| Barred Owl          | 290,000             |
| Burrowing Owl       | 140,000             |
| Great-horned Owl    | 420,000             |
| Eastern Screech Owl | 60,000              |

Data were retrieved from: Bird Conservancy of the Rockies, Avian Conservation Assessment and Population Estimates Databases; 2023 [cited 2023 July 6]. Partners in Flight Databases: Population Estimates [Internet]. Available from: <https://pif.birdconservancy.org/population-estimate-database-scores/>
